# Supplementary material
Source: PubMed Central journal article supplement (PMC7387180)
Supplement: NIHMS1596194-supplement-6.pdf [file NIHMS1596194-supplement-6.pdf]

Supplementary Table 2. Five-fold cross-validation AUC measures of MIL models on test datasets.

| Models             | Max pooling | Mean pooling |
|--------------------|-------------|--------------|
| S (S training) MIL | 0.926±0.050 | 0.949±0.035  |
| T (T training) MIL | 0.941±0.027 | 0.954±0.033  |
| Multi-view MIL     | 0.928±0.045 | 0.961±0.026  |
