# Supplementary material
Source: PubMed Central journal article supplement (PMC7387180)
Supplement: NIHMS1596194-supplement-7.pdf [file NIHMS1596194-supplement-7.pdf]

Supplementary Table 3. Five-fold cross-validation classification accuracy of MIL models trained with different deep learning models on test datasets.

|                     | S (S training)<br>SIL | S (S training)<br>MIL | T (T training)<br>SIL | T (T training)<br>MIL | Multi-view<br>MIL  |
|---------------------|-----------------------|-----------------------|-----------------------|-----------------------|--------------------|
| VGG16               | 0.796±0.064           | 0.949±0.035           | <b>0.815±0.071</b>    | <b>0.954±0.033</b>    | 0.961±0.026        |
| ResNet-v2           | 0.762±0.059           | 0.939±0.035           | 0.780±0.073           | 0.937±0.045           | 0.952±0.031        |
| Inception_Resnet v2 | <b>0.805±0.065</b>    | <b>0.954±0.037</b>    | 0.797±0.075           | 0.952±0.031           | <b>0.965±0.025</b> |
