# Supplementary material
Source: PubMed Central journal article supplement (PMC7387180)
Supplement: NIHMS1596194-supplement-8.pdf [file NIHMS1596194-supplement-8.pdf]

Supplementary Table 1. Prediction models trained and tested based on different combinations of 2D kidney images.

| training data                         |                       | sagittal view  | transverse view    |
|---------------------------------------|-----------------------|----------------|--------------------|
| testing data                          |                       |                |                    |
| single instance in sagittal view      | S (S training)<br>SIL | -              |                    |
| single instance in transverse view    | -                     |                | T (T training) SIL |
| multiple instances in sagittal view   | S (S training)<br>MIL |                |                    |
| multiple instances in transverse view | -                     |                | T (T training) MIL |
| Multi instances in both views         |                       | Multi-view MIL |                    |
